# Supplementary material for: Coherent modulation of two-photon up-conversion from colloidal quantum dots by femtosecond laser
Source: Royal Society of Chemistry journal article supplement (doi:10.1039/c5ra17435j), 2015-01-01
Supplement: c5ra17435j1.pdf [file c5ra17435j1.pdf]

## Supplementary Information

### Coherent modulation of two-photon up-conversion from colloidal quantum dots by femtosecond laser

Cheng Xu,<sup>a</sup> Yunhua Yao,<sup>b</sup> Chaodan Pu,<sup>c</sup> Shian Zhang,<sup>b</sup> Xiaofeng Liu,<sup>\*a</sup> and Jianrong Qiu<sup>\*a,d</sup>

#### 1. Sample preparation

CdSe core QDs were synthesized according to the method introduced in ref. 1 and ref. 2. CdSe/ZnS core/shell QDs were purchased from Najing Technology Corporation Limited. CdS QDs doped glass was synthesized by a modified melt-quenching method<sup>3</sup>. A potassium borosilicate glass with the composition of SiO<sub>2</sub> (72%), B<sub>2</sub>O<sub>3</sub> (9%), and K<sub>2</sub>O (19%) (in mol% of each oxide) was chosen as the matrix and CdS (1 wt%) was added to raw material mixture. The glass sample was melted in alumina crucible at 1400 °C for 1 h and then cast into a brass mold followed by annealing at 650 °C for 8 h.

#### 2. Experimental results

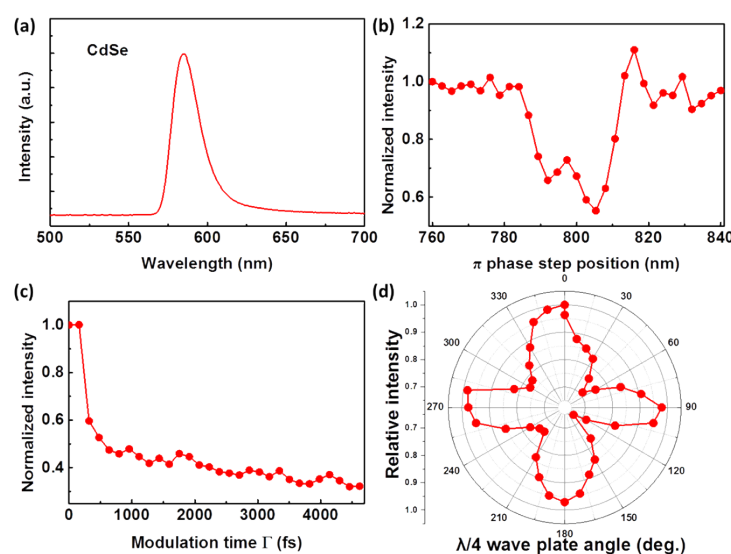

Fig. S1 (a) The two-photon fluorescence spectrum of CdSe core QDs, and two-photon fluorescence intensity as a function of (b) the  $\pi$  phase step position, (c) the modulation time  $\Gamma$  and (d) the  $\lambda/4$  wave plate angle excited by 800nm femtosecond laser with the repetition rate of 1 kHz.

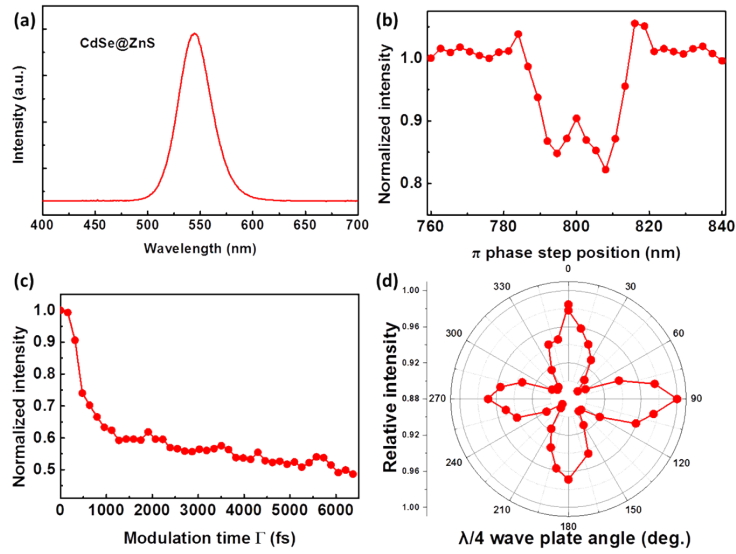

Fig. S2 (a) The two-photon fluorescence spectrum of CdSe/ZnS core/shell QDs, and two-photon fluorescence intensity as a function of (b) the  $\pi$  phase step position, (c) the modulation time  $\Gamma$  and (d) the  $\lambda/4$  wave plate angle excited by 800nm femtosecond laser with the repetition rate of 1 kHz.

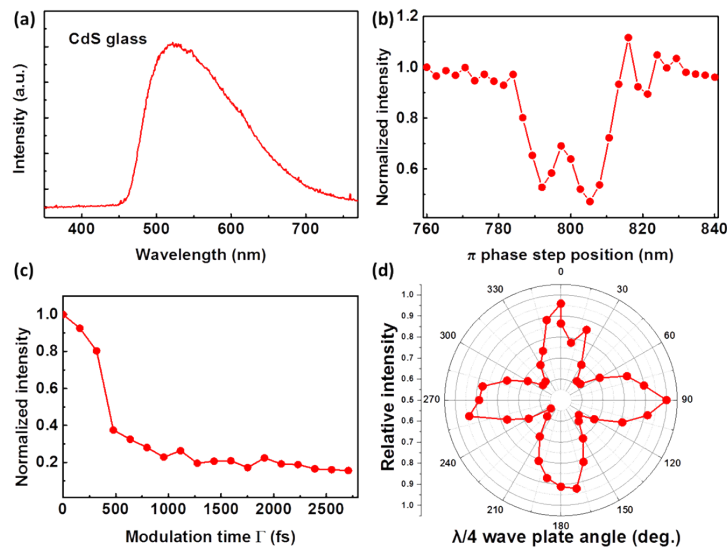

Fig. S3 (a) The two-photon fluorescence spectrum of CdS glass, and two-photon fluorescence intensity as a function of (b) the  $\pi$  phase step position, (c) the modulation time  $\Gamma$  and (d) the  $\lambda/4$  wave plate angle excited by 800nm femtosecond laser with the repetition rate of 1 kHz.

#### Reference

- 1 W. Nan, Y. Niu, H. Qin, F. Cui, Y. Yang, R. Lai, W. Lin and X. Peng, *J. Am. Chem. Soc.*, 2012, **134**, 19685.
- 2 H. Qin, Y. Niu, R. Meng, X. Lin, R. Lai, W. Fang and X. Peng, *J. Am. Chem. Soc.*, 2014, **136**, 179.
- 3 V. Sukumar and R. H. Doremus, *Phys. Status. Solidi. B*, 1993, **179**, 307.
